# Supplementary material for: Physical vapor deposited highly oriented V2O5 thin films for electrocatalytic oxidation of hydrazine
Source: Royal Society of Chemistry journal article supplement (doi:10.1039/c6ra09109a), 2016-01-01
Supplement: c6ra09109a1.pdf [file c6ra09109a1.pdf]

## Electronic Supporting Information

### Physical Vapor Deposited highly oriented V<sub>2</sub>O<sub>5</sub> thin films for Electrocatalytic Oxidation of Hydrazine

Shrividhya Thiagarajan<sup>a,b</sup>, Mahalingam Thaiyan<sup>a</sup> and Ravi Ganesan<sup>a\*</sup>

<sup>a</sup>School of Physics, Alagappa University, Karaikudi, India-630004

<sup>b</sup>Department of Physics, Kalasalingam University, Krishnankoil, India 626 126

\*Author for correspondence (e-mail: [gravicrc@gmail.com](mailto:gravicrc@gmail.com); [raviganesa@rediffmail.com](mailto:raviganesa@rediffmail.com) Telephone: +91-04565-225206; Fax: +91-04565-225202)

**Table S1** Frequency assignment for Micro-Raman data

| Wavenumber<br>(cm <sup>-1</sup> ) | Remarks                                                                                                                                                       | Assignment | Modes           |
|-----------------------------------|---------------------------------------------------------------------------------------------------------------------------------------------------------------|------------|-----------------|
| 285                               | Bending vibration of V=O <sub>v</sub> bond ( <i>d</i> <sub>1</sub> )                                                                                          | δ(V=O)b    | B <sub>2g</sub> |
| 305                               | Bending vibration of V-O bond ( <i>d</i> <sub>4</sub> )                                                                                                       | δ(V-O)b    | A <sub>g</sub>  |
| 406                               | Bending vibration of V=O bond ( <i>d</i> <sub>1</sub> )                                                                                                       | δ(V=O)b    | A <sub>g</sub>  |
| 483                               | Bending vibration of V–O–V bond ( <i>d</i> <sub>2</sub> ) related to the deformation involving displacement of the bridging oxygen atom along the z-direction | δ(V-O-V)b  | B <sub>2g</sub> |
| 525                               | Stretching vibration of V-O bond ( <i>d</i> <sub>4</sub> )                                                                                                    | ν(V-O)s    | A <sub>g</sub>  |
| 701                               | Asymmetric bond stretching of V-O-V bridging bond ( <i>d</i> <sub>3</sub> )                                                                                   | ν(V-O-V)s  | B <sub>1g</sub> |
| 996                               | Stretching of vanadium atoms connected to oxygen atoms V=O bond ( <i>d</i> <sub>1</sub> ) (terminal oxygen)                                                   | ν(V=O)s    | A <sub>g</sub>  |

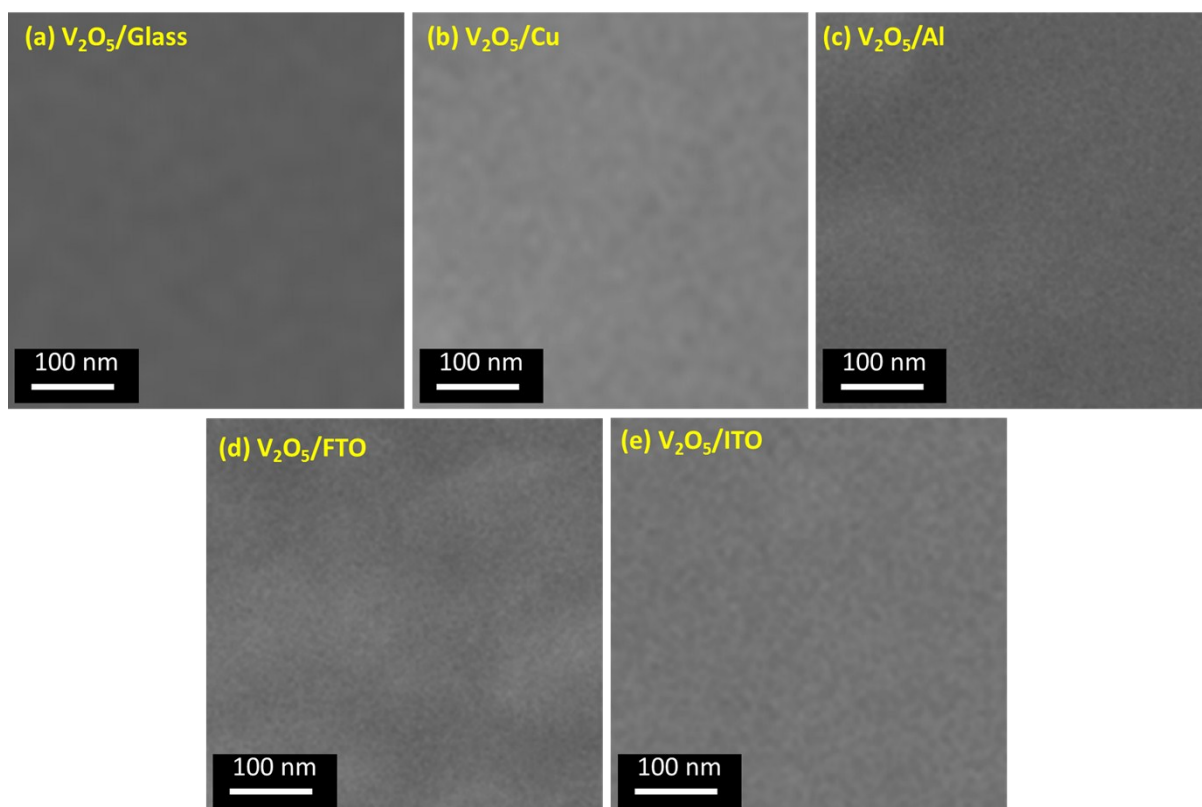

**Fig. S1.** SEM micrographs of  $V_2O_5$  thin films deposited on (a) Glass (b) Cu (c) Al (d) ITO and (e) FTO substrates

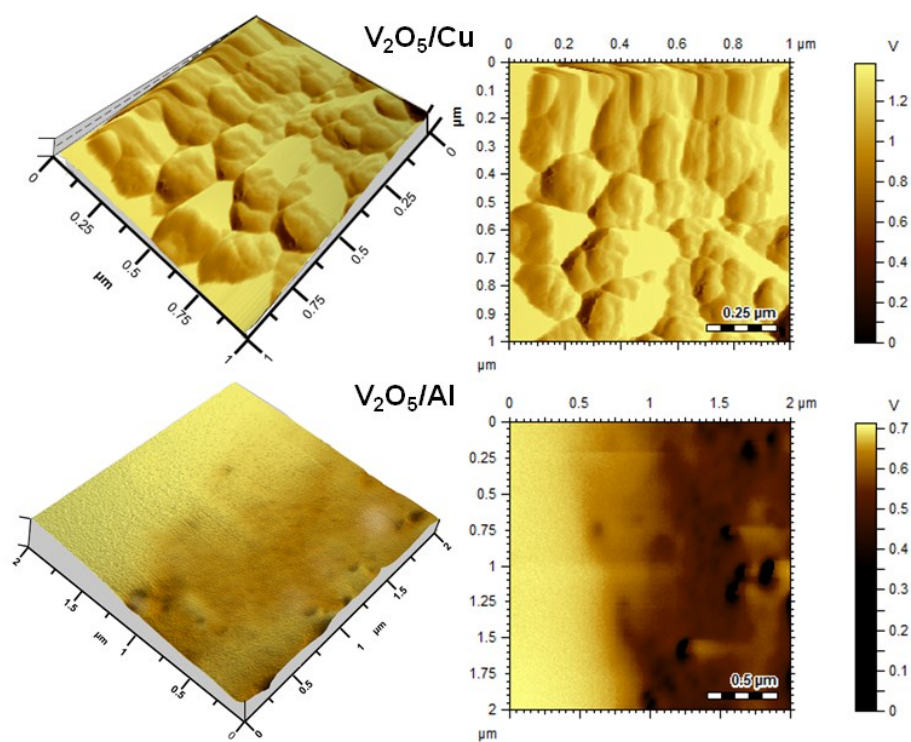

**Fig. S2.** AFM topographs of  $V_2O_5$  thin films deposited on Cu and Al substrates

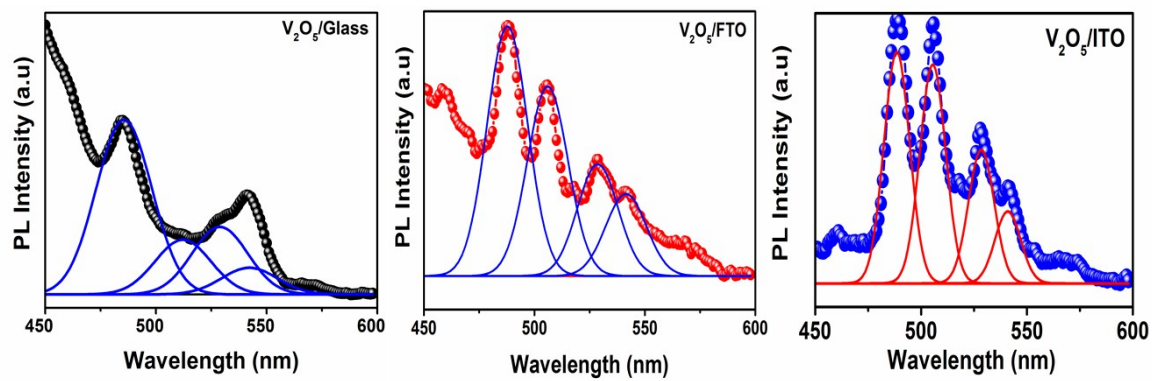

**Fig. S3.** Gaussian resolved PL spectra for  $V_2O_5$  thin films coated on different substrates

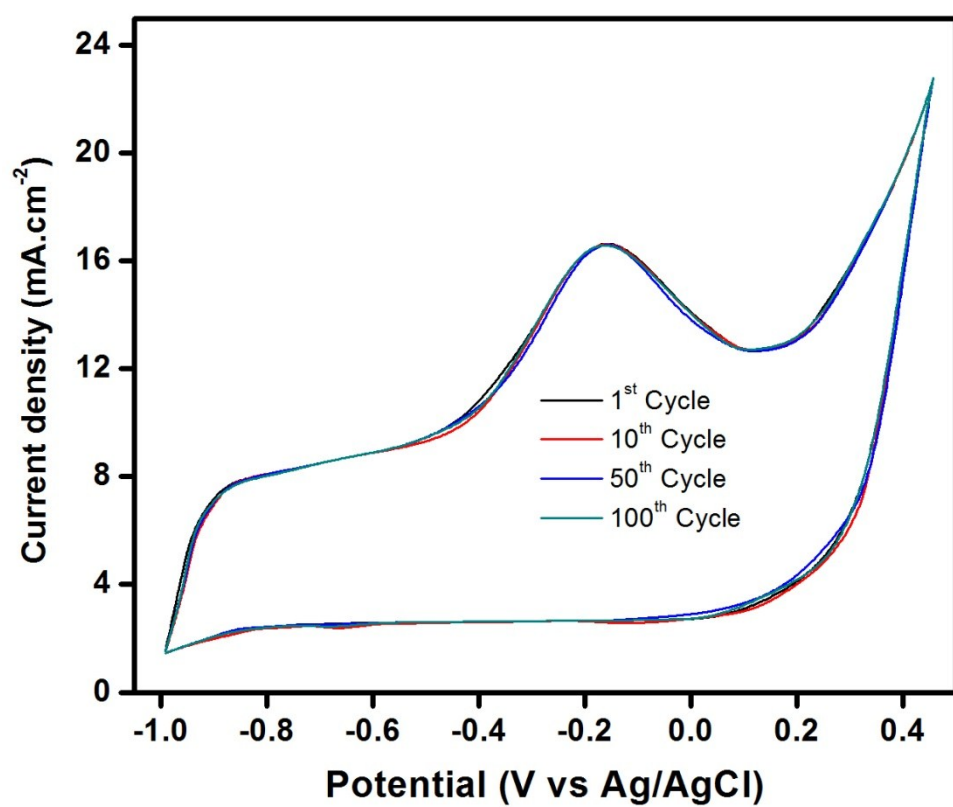

**Fig. S4.** Cycle stability of  $\text{V}_2\text{O}_5$  thin film coated on ITO substrate at scan rate of 100 mV/s
